# Supplementary material for: Frequency data for 17 Y-chromosomal STRs and 19 Y-chromosomal SNPs in the Tyrolean district of Reutte, Austria
Source: Springer Nature journal article supplement (doi:10.1007/s00414-012-0751-1), 2012-08-16
Supplement: MOESM4 [file 414_2012_751_MOESM4_ESM.doc]

**Table S4** Pairwise genetic distances: P values are shown above, Fst values below the diagonal

|  | | | | | | | | | |  |
| --- | --- | --- | --- | --- | --- | --- | --- | --- | --- | --- |
| Population | Brescia | Freiburg | Lombardy | Munich | Salzburg | Stuttgart | Udine | Veneto | Verona | Reutte |
| Brescia | - | **0.0093** | 0.1422 | **0.0004** | **0.0001** | **0.0009** | **0.0011** | **<0.0001** | 0.0185 | **0.0027** |
| Freiburg | 0.0020 | - | 0.3327 | 0.1205 | 0.2108 | 0.5252 | **0.0005** | **0.0113** | 0.0282 | **0.0074** |
| Lombardy | 0.0008 | 0.0001 | - | 0.0140 | **0.0108** | 0.0275 | **0.0011** | **0.0018** | 0.0876 | **0.0031** |
| Munich | 0.0036 | 0.0003 | 0.0012 | - | 0.1799 | 0.3718 | **0.0006** | 0.0257 | 0.0140 | 0.0205 |
| Salzburg | 0.0040 | 0.0003 | 0.0015 | 0.0004 | - | 0.0861 | **0.0011** | **0.0092** | 0.0241 | 0.0256 |
| Stuttgart | 0.0027 | 0.00001 | 0.0007 | 0.00001 | 0.0004 | - | **0.0005** | **0.0045** | 0.0127 | **0.0003** |
| Udine | 0.0090 | 0.0059 | 0.0069 | 0.0053 | 0.0045 | 0.0054 | - | **< 0.0001** | **0.0035** | **0.0006** |
| Veneto | 0.0053 | 0.0013 | 0.0024 | 0.0010 | 0.0011 | 0.0015 | 0.0049 | - | **0.0111** | **0.0006** |
| Verona | 0.0022 | 0.0008 | 0.0008 | 0.0011 | 0.0010 | 0.0010 | 0.0041 | 0.0011 | - | **0.0043** |
| Reutte | 0.0028 | 0.0009 | 0.0018 | 0.0008 | 0.0010 | 0.0010 | 0.0060 | 0.0021 | 0.0015 | - |

Statistical significance after correcting α = 0.05 for multiple comparisons (critical value: 0.011377, [5]) is indicated by bold typeface. P-values below the critical value obtained by the Bonferroni method (0.05/45 = 0.001111) are underlined.
